# Supplementary material
Source: PubMed Central journal article supplement (PMC2614383)
Supplement: NIHMS53238-supplement-PDF_file.pdf [file NIHMS53238-supplement-PDF_file.pdf]

# Detailed Characterization and Profiles of Crankcase and Diesel Particulate Matter Exhaust Emissions Using Speciated Organics.

Barbara Zielinska<sup>1\*</sup>, David Campbell<sup>1</sup>, Douglas R. Lawson<sup>2</sup>, Robert G. Ireson<sup>3</sup>, Christopher S. Weaver<sup>4</sup>, Thomas W. Hesterberg<sup>5</sup>, Timothy Larson<sup>6</sup>, Mark Davey<sup>7</sup> and L.-J. Sally Liu<sup>7,8</sup>

<sup>1</sup>Desert Research Institute, 2215 Raggio Pkwy, Reno, NV 89512-1095, <sup>2</sup>National Renewable Energy Laboratory, Golden, CO 80401-3393, <sup>3</sup>Air Quality Management Consulting, Greenbrae, CA 94904, <sup>4</sup>Engine Fuel & Emissions Engineering, Inc., Rancho Cordova, CA 95742, <sup>5</sup>International Truck and Engine Corporation, Warrenville, IL 60555, <sup>6</sup>Department of Civil and Environmental Engineering, <sup>7</sup>Department of Environmental and Occupational Health Sciences, University of Washington, Seattle, WA 98105, <sup>8</sup>Institute of Social and Preventive Medicine, University of Basel, CH-4051 Basel, Switzerland.

## **Supplemental Material**

## Details of Dilution Tunnel Sampling

Tailpipe and crankcase vent emissions testing was conducted using the Ride Along-Vehicle Emissions Measurement System (RAVEM) (1). RAVEM is a portable dilution tunnel based on proportional partial-flow constant volume sampling (CVS) from the vehicle exhaust pipe. Isokinetic sampling in the tailpipe and subsequent dilution produces a diluted exhaust stream comparable to that of full-flow CVS systems used in chassis and engine dynamometer testing, but allows measurements to be made on-board a moving vehicle (see <http://www.efee.com/ravem.html> for more information regarding RAVEM).

For the tailpipe sampling, the RAVEM was mounted inside the bus, and the isokinetic partial-flow sampling was used (i.e. the normal RAVEM operating mode). To collect crankcase vent emission samples, the RAVEM dilution tunnel module was mounted on the front bumper of each bus, and the full flow from the road draft tube was ducted directly into the tunnel. A "road draft tube" is a tube (typically about 3/4 inch ID, made of rubber or steel) that carries gases from the rocker arm cover (near the top of the engine) vertically downward to near the bottom of the vehicle, where the end is exposed to the air. Its purpose is to ventilate the crankcase that is full of the hot lubricating oil that is being agitated by the motion of the pistons and crankshaft. Blowby gases that leak past the piston rings pass into the crankcase, where they mix with oil vapor and oil aerosol. From there, they pass via the road draft tube to the air under the vehicle. The venturi effect of air passing by the end of the tube creates a slight suction ("draft") that aids in the ventilation by drawing fresh air into the crankcase.

For front-engine buses, the road draft tube discharge is typically about three feet forward (and thus directly upwind) of the firewall between the passenger compartment and the engine. This firewall has a number of penetrations, including those for the pedals and steering, that could allow air mixed with crankcase vapors to enter the passenger compartment.

For crankcase sampling, we connected the end of the road draft tube to a liquid trap (a short section of 2 inch PVC pipe), then to a 1/2 inch ID rubber hose that was approximately 36 inches long. Purpose of the liquid trap was to collect any liquid that dripped from the road draft tube and prevent it from being drawn into the dilution tunnel. The other end of the rubber hose was connected to raw gas inlet of the RAVEM dilution tunnel. The throttle at the entrance to the dilution tunnel was adjusted to bring the pressure inside the tunnel slightly below atmospheric, thus simulating the slight suction due to the venturi effect on the end of the road draft tube.

In operation, crankcase gases passed through the road draft tube and our sampling tube into the dilution tunnel, where they were mixed with filtered air. The tunnel control system was programmed to maintain a constant molar flow rate of 800 standard liters per minute out of the dilution tunnel. Pre-weighed 47 mm particulate filters were exposed to (1) the mixture of crankcase gas and filtered air and (2) the filtered air alone by drawing them through the filters at a controlled flow rate of 16.6 liters per minute. The filters were then reweighed to determine the PM mass collected on the filter, and from this, the PM mass contained in the crankcase emissions.

**Table S1:** Crankcase and tailpipe emission rates of measured species for Bus 1 and Bus 2 and these species concentrations in lube oil and diesel fuel used in these buses

| Species                       | Mnemonic      | CKB1     |                       | CKB2     |                       | TPB1     |                       | TPB2     |                       | Lube Oil                     |        | Fuel     |
|-------------------------------|---------------|----------|-----------------------|----------|-----------------------|----------|-----------------------|----------|-----------------------|------------------------------|--------|----------|
|                               |               | Aver age | St. Dev. <sup>a</sup> | Oil B1                       | Oil B2 | Aver age |
| PM2.5 (mg/km)                 |               | 35.82    | 11.41                 | 98.67    | 32.88                 | 152.02   | 49.70                 | 141.15   | 18.69                 |                              |        |          |
| OC (mg/km)                    |               | 22.06    | 2.46                  | 46.15    | 20.91                 | 20.99    | b                     | 33.10    | 6.32                  |                              |        |          |
| EC (mg/km)                    |               | 0.76     | 0.40                  | 1.01     | 0.89                  | 145.09   | b                     | 94.08    | 8.11                  |                              |        |          |
| <b>Alkanes (microgram/km)</b> |               |          |                       |          |                       |          |                       |          |                       | <b>Alkanes (microgram/g)</b> |        |          |
| Norfarnesane                  | 2,6,10-C14    | 0.00     | 0.00                  | 0.19     | 0.20                  | 7.61     | b                     | 1.22     | 2.11                  | 20.99                        | 21.67  | 1209.4   |
| Heptylcyclohexane             | C7-Cyhx       | 0.00     | 0.00                  | 0.37     | 0.36                  | 0.00     | b                     | 5.46     | 6.55                  | 0.79                         | 0.23   | 513.43   |
| Farnesane                     | 2,6,10-C15    | 0.42     | 0.41                  | 1.18     | 0.82                  | 6.20     | b                     | 2.58     | 4.47                  | 1.70                         | 0.34   | 1572.7   |
| Tetradecane                   | nC14          | 1.07     | 0.69                  | 8.38     | 5.07                  | 0.00     | b                     | 36.83    | 35.48                 | 29.15                        | 16.35  | 4488.8   |
| Octylcyclohexane              | C8-Cyhx       | 0.00     | 0.00                  | 0.48     | 0.67                  | 0.00     | b                     | 3.18     | 5.51                  | 1.85                         | 0.72   | 330.89   |
| Pentadecane                   | nC15          | 0.72     | 0.87                  | 14.99    | 9.33                  | 32.98    | b                     | 74.93    | 27.86                 | 35.30                        | 24.16  | 3557.0   |
| Nonylcyclohexane              | C9-Cyhx       | 0.21     | 0.36                  | 0.82     | 0.64                  | 0.00     | b                     | 0.27     | 0.46                  | 4.38                         | 1.28   | 383.70   |
| Hexadecane                    | nC16          | 4.74     | 2.63                  | 21.15    | 11.80                 | 35.71    | b                     | 105.24   | 36.61                 | 69.32                        | 61.47  | 5355.5   |
| Norpristane                   | 2,6,10-C18    | 1.42     | 2.00                  | 9.38     | 5.27                  | 4.94     | b                     | 36.52    | 33.03                 | 25.22                        | 21.71  | 2371.8   |
| Heptadecane                   | nC17          | 5.63     | 8.08                  | 42.31    | 24.72                 | 84.67    | b                     | 316.47   | 134.2                 | 126.78                       | 105.68 | 4872.3   |
| Decylcyclohexane              | C10-Cyhx      | 0.16     | 0.15                  | 2.06     | 1.34                  | 0.00     | b                     | 10.05    | 4.34                  | 4.95                         | 2.08   | 311.73   |
| Pristane                      | 2,6,10,14-C19 | 0.00     | 0.00                  | 0.38     | 0.43                  | 0.00     | b                     | 9.56     | 16.55                 | 34.06                        | 34.47  | 418.94   |
| Undecylcyclohexane            | C11-Cyhx      | 1.62     | 1.31                  | 2.46     | 1.27                  | 0.00     | b                     | 0.00     | 0.00                  | 12.91                        | 10.27  | 340.58   |
| Octadecane                    | nC18          | 13.39    | 4.97                  | 31.82    | 16.81                 | 266.75   | b                     | 345.94   | 64.13                 | 172.47                       | 155.82 | 4587.9   |
| Phytane                       | 2,6,10,14-C20 | 11.25    | 2.61                  | 18.09    | 9.34                  | 21.76    | b                     | 79.20    | 17.90                 | 107.38                       | 97.52  | 431.17   |
| Dodecylcyclohexane            | C12-Cyhx      | 2.53     | 0.70                  | 3.80     | 2.07                  | 3.28     | b                     | 16.26    | 7.93                  | 21.44                        | 20.05  | 356.97   |
| Nonadecane                    | nC19          | 22.52    | 3.20                  | 33.31    | 16.45                 | 516.48   | b                     | 554.83   | 95.82                 | 221.21                       | 208.29 | 3911.8   |
| Tridecylcyclohexane           | C13-Cyhx      | 1.79     | 1.72                  | 5.13     | 2.55                  | 27.84    | b                     | 26.75    | 8.45                  | 33.60                        | 32.73  | 115.30   |
| Eicosane                      | nC20          | 19.80    | 3.26                  | 37.36    | 21.14                 | 460.38   | b                     | 407.69   | 88.21                 | 318.31                       | 311.59 | 2983.9   |
| Tetradecylcyclohexane         | C14-Cyhx      | 2.52     | 2.81                  | 8.87     | 3.12                  | 11.49    | b                     | 11.56    | 1.18                  | 103.86                       | 104.36 | 156.15   |
| Heneicosane                   | nC21          | 15.68    | 4.05                  | 41.13    | 21.39                 | 263.78   | b                     | 368.73   | 336.4                 | 415.49                       | 391.14 | 3737.7   |
| Pentadecylcyclohexane         | C15-Cyhx      | 10.84    | 2.31                  | 19.83    | 7.94                  | 0.00     | b                     | 33.72    | 18.01                 | 262.02                       | 248.69 | 77.45    |
| Docosane                      | nC22          | 12.63    | 2.07                  | 38.04    | 19.48                 | 29.66    | b                     | 79.85    | 31.44                 | 448.23                       | 434.86 | 1600.6   |
| Hexadecylcyclohexane          | C16-Cyhx      | 5.04     | 3.53                  | 15.75    | 15.59                 | 2.70     | b                     | 7.56     | 3.49                  | 251.64                       | 251.22 | 31.87    |

| Species                                       | Mnemonic | CKB1        |                          | CKB2        |                          | TPB1        |                          | TPB2        |                          | Lube Oil                       |        | Fuel        |
|-----------------------------------------------|----------|-------------|--------------------------|-------------|--------------------------|-------------|--------------------------|-------------|--------------------------|--------------------------------|--------|-------------|
|                                               |          | Aver<br>age | St.<br>Dev. <sup>a</sup> | Oil B1                         | Oil B2 | Aver<br>age |
| Tricosane                                     | nC23     | 5.21        | 7.45                     | 21.84       | 9.30                     | 5.41        | b                        | 14.00       | 12.12                    | 335.04                         | 339.95 | 923.06      |
| Heptadecylcyclohexane                         | C17-Cyhx | 15.63       | 5.25                     | 18.79       | 9.03                     | 0.00        | b                        | 68.66       | 59.62                    | 303.17                         | 276.25 | 16.95       |
| Octadecylcyclohexane                          | C18-Cyhx | 2.18        | 0.65                     | 7.38        | 7.20                     | 0.00        | b                        | 0.23        | 0.41                     | 318.09                         | 251.03 | 5.82        |
| Tetracosane                                   | nC24     | 8.07        | 1.51                     | 20.13       | 8.26                     | 0.02        | b                        | 25.67       | 7.26                     | 257.38                         | 296.42 | 493.14      |
| Pentacosane                                   | nC25     | 8.90        | 2.64                     | 17.70       | 20.25                    | 10.52       | b                        | 10.47       | 14.51                    | UCM                            | UCM    | 254.71      |
| Nonadecylcyclohexane                          | C19-Cyhx | 5.21        | 5.01                     | 5.71        | 3.04                     | 0.00        | b                        | 11.48       | 16.36                    | 141.28                         | 157.82 | 18.94       |
| Hexacosane                                    | nC26     | 4.61        | 1.01                     | 23.75       | 23.09                    | 0.00        | b                        | 1.64        | 2.85                     | UCM                            | UCM    | 97.38       |
| Eicosylcyclohexane                            | C20-Cyhx | 0.78        | 0.45                     | 2.08        | 1.53                     | 0.00        | b                        | 1.20        | 2.08                     | 128.03                         | 137.39 | 0.19        |
| Heptacosane                                   | nC27     | 11.15       | 3.85                     | 8.02        | 6.75                     | 0.00        | b                        | 10.15       | 14.08                    | UCM                            | UCM    | 41.96       |
| Heneicosylcyclohexane                         | C21-Cyhx | 2.95        | 1.81                     | 2.72        | 3.30                     | 0.00        | b                        | 0.49        | 0.84                     | UCM                            | UCM    | 0.92        |
| Octacosane                                    | nC28     | 2.81        | 3.28                     | 14.53       | 3.34                     | 0.00        | b                        | 16.96       | 25.40                    | UCM                            | UCM    | 20.44       |
| Nonacosane                                    | nC29     | 4.46        | 2.66                     | 24.80       | 25.95                    | 0.00        | b                        | 9.11        | 6.03                     | UCM                            | UCM    | 12.55       |
| Triacontane                                   | nC30     | 12.64       | 1.31                     | 15.57       | 16.93                    | 0.00        | b                        | 1.92        | 1.83                     | UCM                            | UCM    | 12.62       |
| Hentriacontane                                | nC31     | 0.76        | 0.92                     | 14.27       | 8.72                     | 8.40        | b                        | 0.00        | 0.00                     | UCM                            | UCM    | 7.60        |
| Dotriacontane                                 | nC32     | 1.11        | 0.29                     | 4.52        | 3.44                     | 0.00        | b                        | 0.00        | 0.00                     | UCM                            | UCM    | 7.45        |
| Tritriacontane                                | nC33     | 1.14        | 1.06                     | 4.17        | 3.25                     | 15.55       | b                        | 1.22        | 2.11                     | UCM                            | UCM    | 4.05        |
| Tetratriacontane                              | nC34     | 2.49        | 1.81                     | 1.04        | 1.08                     | 0.00        | b                        | 4.91        | 2.07                     | UCM                            | UCM    | 4.83        |
| Pentatriacontane                              | nC35     | 0.55        | 0.87                     | 2.09        | 1.96                     | 3.67        | b                        | 2.06        | 2.45                     | UCM                            | UCM    | 1.17        |
| Hexatriacontane-d74                           | nC36d74  | 124.34      | 26.40                    | 165.78      | 88.09                    | 71.00       | b                        | 37.31       | 10.34                    | 2198.2                         | 1375.2 | 1.09        |
| Hexatriacontane                               | nC36     | 0.16        | 0.04                     | 0.00        | 0.00                     | 2.03        | b                        | 0.00        | 0.00                     | UCM                            | UCM    | 2.34        |
| Heptatriacontane                              | nC37     | 0.13        | 0.13                     | 0.13        | 0.09                     | 0.29        | b                        | 0.26        | 0.46                     | UCM                            | UCM    | 1.05        |
| Octatriacontane                               | nC38     | 0.27        | 0.30                     | 0.11        | 0.07                     | 0.00        | b                        | 0.24        | 0.42                     | UCM                            | UCM    | 2.39        |
| Nonatriacontane                               | nC39     | 0.14        | 0.08                     | 0.05        | 0.09                     | 0.00        | b                        | 0.01        | 0.02                     | UCM                            | UCM    | 0.59        |
| Tetracontane                                  | nC40     | 0.18        | 0.21                     | 0.14        | 0.11                     | 0.00        | b                        | 1.52        | 1.32                     | UCM                            | UCM    | 1.19        |
| <b>Hopananes (microgram/km)</b>               |          |             |                          |             |                          |             |                          |             |                          | <b>Hopananes (microgram/g)</b> |        |             |
| 18 $\alpha$ (H)-22,29,30-<br>Trisnorneohopane | hop13    | 5.37        | 1.23                     | 10.51       | 3.78                     | 1.35        | b                        | 2.32        | 2.39                     | 100.66                         | 138.28 | 0.52        |
| 17 $\alpha$ (H)-22,29,30-Trisnorhopane        | hop15    | 2.39        | 0.44                     | 4.68        | 1.70                     | 0.68        | b                        | 1.75        | 0.55                     | 143.61                         | 195.53 | 0.65        |
| 17 $\alpha$ (H),21 $\beta$ (H)-29-Norhopane   | hop17    | 24.08       | 6.07                     | 47.82       | 17.89                    | 4.73        | b                        | 13.39       | 7.68                     | 571.52                         | 731.81 | 1.19        |
| 17 $\alpha$ (H),21 $\beta$ (H)-Hopane         | hop19    | 12.77       | 2.51                     | 24.67       | 9.22                     | 4.06        | b                        | 7.85        | 4.90                     | 300.02                         | 386.12 | 0.91        |
| 17 $\beta$ (H),21 $\alpha$ (H)-hopane         | hop20    | 1.39        | 0.42                     | 2.60        | 1.07                     | 0.00        | b                        | 0.76        | 0.80                     | 18.84                          | 24.56  | 0.13        |
| 22S-17 $\alpha$ (H),21 $\beta$ (H)-30-        | hop21    | 8.91        | 2.04                     | 17.12       | 6.29                     | 2.03        | b                        | 4.83        | 3.39                     | 200.93                         | 248.68 | 0.52        |

| Species                                             | Mnemonic  | CKB1        |                          | CKB2        |                          | TPB1        |                          | TPB2        |                          | Lube Oil                      |        | Fuel        |
|-----------------------------------------------------|-----------|-------------|--------------------------|-------------|--------------------------|-------------|--------------------------|-------------|--------------------------|-------------------------------|--------|-------------|
|                                                     |           | Aver<br>age | St.<br>Dev. <sup>a</sup> | Oil B1                        | Oil B2 | Aver<br>age |
| Homohopane                                          |           |             |                          |             |                          |             |                          |             |                          |                               |        |             |
| 22R-17 $\alpha$ (H),21 $\beta$ (H)-30-              | hop22     | 7.00        | 1.86                     | 14.33       | 5.40                     | 0.00        | b                        | 3.82        | 2.89                     | 162.65                        | 188.05 | 0.35        |
| Homohopane                                          |           |             |                          |             |                          |             |                          |             |                          |                               |        |             |
| 17 $\beta$ (H),21 $\beta$ (H)-Hopane                | hop23     | 1.78        | 0.31                     | 3.29        | 1.20                     | 1.35        | b                        | 0.34        | 0.49                     | 20.20                         | 31.81  | 0.14        |
| 22S-17 $\alpha$ (H),21 $\beta$ (H)-30,31-           | hop24     | 4.89        | 0.85                     | 8.67        | 3.44                     | 0.00        | b                        | 5.46        | 2.84                     | 111.04                        | 117.76 | 0.31        |
| Bishomohopane                                       |           |             |                          |             |                          |             |                          |             |                          |                               |        |             |
| 22R-17 $\alpha$ (H),21 $\beta$ (H)-30,31-           | hop25     | 3.59        | 0.67                     | 6.30        | 2.79                     | 0.00        | b                        | 0.79        | 1.38                     | 72.02                         | 77.57  | 0.23        |
| Bishomohopane                                       |           |             |                          |             |                          |             |                          |             |                          |                               |        |             |
| 22S-17 $\alpha$ (H),21 $\beta$ (H)-30,31,32-        | hop26     | 2.85        | 0.47                     | 5.21        | 2.01                     | 0.68        | b                        | 1.80        | 1.88                     | 53.61                         | 61.45  | 0.23        |
| Trisomohopane                                       |           |             |                          |             |                          |             |                          |             |                          |                               |        |             |
| 22R-17 $\alpha$ (H),21 $\beta$ (H)-30,31,32-        | hop27     | 2.16        | 0.35                     | 3.68        | 1.45                     | 0.00        | b                        | 2.57        | 2.62                     | 41.77                         | 41.52  | 0.15        |
| Trishomohopane                                      |           |             |                          |             |                          |             |                          |             |                          |                               |        |             |
| <b>Steranes (microgram/km)</b>                      |           |             |                          |             |                          |             |                          |             |                          | <b>Steranes (microgram/g)</b> |        |             |
| 20S-5 $\alpha$ (H),14 $\alpha$ (H),17 $\alpha$ (H)- | ster42    | 0.42        | 0.15                     | 0.83        | 0.30                     | 0.00        | b                        | 1.01        | 0.50                     | 35.06                         | 38.03  | 0.59        |
| cholestane                                          |           |             |                          |             |                          |             |                          |             |                          |                               |        |             |
| 20R-5 $\alpha$ (H),14 $\beta$ (H),17 $\beta$ (H)-   | ster43    | 2.80        | 1.05                     | 5.66        | 2.77                     | 0.71        | b                        | 1.85        | 1.29                     | 96.19                         | 138.39 | 0.66        |
| cholestane                                          |           |             |                          |             |                          |             |                          |             |                          |                               |        |             |
| 20S-5 $\alpha$ (H),14 $\beta$ (H),17 $\beta$ (H)-   | ster44    | 3.42        | 0.91                     | 7.24        | 2.93                     | 1.35        | b                        | 2.28        | 1.47                     | 75.71                         | 96.98  | 0.35        |
| cholestane                                          |           |             |                          |             |                          |             |                          |             |                          |                               |        |             |
| 20R-5 $\alpha$ (H),14 $\alpha$ (H),17 $\alpha$ (H)- | ster45_40 | 4.68        | 0.99                     | 6.89        | 1.87                     | 2.03        | b                        | 2.76        | 1.05                     | 123.88                        | 166.46 | 0.65        |
| cholestane & 20S-13 $\beta$ (H),17 $\alpha$ (H)-    |           |             |                          |             |                          |             |                          |             |                          |                               |        |             |
| diastigmastane                                      |           |             |                          |             |                          |             |                          |             |                          |                               |        |             |
| 20S-5 $\alpha$ (H),14 $\alpha$ (H),17 $\alpha$ (H)- | ster46    | 1.32        | 0.30                     | 1.75        | 0.21                     | 0.00        | b                        | 0.00        | 0.00                     | 25.76                         | 19.89  | 0.22        |
| ergostane                                           |           |             |                          |             |                          |             |                          |             |                          |                               |        |             |
| 20R-5 $\alpha$ (H),14 $\beta$ (H),17 $\beta$ (H)-   | ster47    | 3.36        | 0.98                     | 4.77        | 1.65                     | 1.41        | b                        | 2.37        | 2.09                     | 56.94                         | 98.71  | 0.09        |
| ergostane                                           |           |             |                          |             |                          |             |                          |             |                          |                               |        |             |
| 20S-5 $\alpha$ (H),14 $\beta$ (H),17 $\beta$ (H)-   | ster48    | 2.59        | 0.70                     | 6.02        | 2.24                     | 0.68        | b                        | 1.04        | 1.22                     | 103.85                        | 155.44 | 1.41        |
| ergostane & 20R-13 $\alpha$ (H),17 $\beta$ (H)-     |           |             |                          |             |                          |             |                          |             |                          |                               |        |             |
| diastigmastane                                      |           |             |                          |             |                          |             |                          |             |                          |                               |        |             |
| 20R-5 $\alpha$ (H),14 $\alpha$ (H),17 $\alpha$ (H)- | ster49    | 2.44        | 0.36                     | 4.40        | 1.53                     | 0.71        | b                        | 1.24        | 0.45                     | 41.25                         | 51.09  | 0.14        |
| ergostane                                           |           |             |                          |             |                          |             |                          |             |                          |                               |        |             |
| 20S-5 $\alpha$ (H),14 $\alpha$ (H),17 $\alpha$ (H)- | ster50    | 3.13        | 0.95                     | 5.55        | 2.30                     | 0.68        | b                        | 1.49        | 0.09                     | 36.35                         | 47.21  | 0.09        |
| stigmastane                                         |           |             |                          |             |                          |             |                          |             |                          |                               |        |             |
| 20R-5 $\alpha$ (H),14 $\beta$ (H),17 $\beta$ (H)-   | ster51    | 5.01        | 1.20                     | 9.48        | 3.77                     | 1.38        | b                        | 2.99        | 0.91                     | 129.12                        | 150.57 | 0.35        |

| Species                                                        | Mnemonic          | CKB1     |                       | CKB2     |                       | TPB1     |                       | TPB2     |                       | Lube Oil                 |        | Fuel     |
|----------------------------------------------------------------|-------------------|----------|-----------------------|----------|-----------------------|----------|-----------------------|----------|-----------------------|--------------------------|--------|----------|
|                                                                |                   | Aver age | St. Dev. <sup>a</sup> | Oil B1                   | Oil B2 | Aver age |
| stigmastane                                                    |                   |          |                       |          |                       |          |                       |          |                       |                          |        |          |
| 20S-5 $\alpha$ (H),14 $\beta$ (H),17 $\beta$ (H)-stigmastane   | ster52            | 3.26     | 0.76                  | 6.13     | 2.36                  | 0.68     | b                     | 1.25     | 0.48                  | 94.51                    | 114.24 | 0.22     |
| 20R-5 $\alpha$ (H),14 $\alpha$ (H),17 $\alpha$ (H)-stigmastane | ster53            | 2.46     | 0.48                  | 4.64     | 1.89                  | 0.68     | b                     | 0.76     | 0.80                  | 61.93                    | 74.49  | 0.15     |
| <b>PAH (microgram/km)</b>                                      |                   |          |                       |          |                       |          |                       |          |                       | <b>PAH (microgram/g)</b> |        |          |
| Retene                                                         | Retene            | 0.00     | 0.00                  | 0.02     | 0.00                  | 0.00     | 0.00                  | 0.00     | 0.00                  | 0.11                     | 0.08   | 0.22     |
| Benzonaphthothiophene                                          | BNapTph           | 0.04     | 0.00                  | 0.09     | 0.04                  | 0.00     | 0.00                  | 0.00     | 0.00                  | 0.98                     | 0.57   | 0.22     |
| Benzo(c)phenanthrene                                           | BcPh              | 0.04     | 0.03                  | 0.05     | 0.02                  | 0.34     | 0.48                  | 0.00     | 0.00                  | 0.00                     | 0.60   | 0.10     |
| Benz(a)anthracene                                              | BaA               | 0.12     | 0.14                  | 0.05     | 0.05                  | 0.00     | 0.00                  | 0.00     | 0.00                  | 0.19                     | 0.11   | 0.12     |
| Chrysene-Triphenylene                                          | Chr/Tphe          | 0.04     | 0.07                  | 0.10     | 0.04                  | 0.00     | 0.00                  | 0.00     | 0.00                  | 0.60                     | 1.36   | 1.53     |
| Benanthrone                                                    | Bzanthrone        | 0.09     | 0.05                  | 0.24     | 0.21                  | 0.34     | 0.48                  | 0.00     | 0.00                  | 0.64                     | 2.27   | 0.21     |
| 7-methylbenz(a)anthracene                                      | 7-MeBaA           | 0.02     | 0.02                  | 0.05     | 0.02                  | 0.00     | 0.00                  | 0.00     | 0.00                  | 0.64                     | 0.34   | 0.03     |
| Benz(a)anthracene-7,12-dione                                   | BaA-7,12-dione    | 0.31     | 0.23                  | 0.30     | 0.10                  | 0.35     | 0.49                  | 0.06     | 0.05                  | 1.21                     | 1.28   | 0.28     |
| 5+6-methylchrysene                                             | 5,6-MeChr         | 0.04     | 0.00                  | 0.09     | 0.10                  | 0.00     | 0.00                  | 0.00     | 0.00                  | 0.00                     | 0.91   | 0.05     |
| Benzo(b+j+k)fluoranthene                                       | B(b+j+k)F         | 0.19     | 0.10                  | 0.06     | 0.04                  | 0.69     | 0.01                  | 1.01     | 0.50                  | 0.42                     | 0.34   | 0.05     |
| BeP                                                            | BeP               | 0.09     | 0.10                  | 0.05     | 0.04                  | 0.34     | 0.48                  | 0.74     | 0.05                  | 0.00                     | 0.26   | 0.08     |
| BaP                                                            | BaP               | 0.06     | 0.04                  | 0.03     | 0.01                  | 0.00     | 0.00                  | 0.00     | 0.00                  | 0.19                     | 0.57   | 0.02     |
| Perylene                                                       | Per               | 0.13     | 0.12                  | 0.12     | 0.09                  | 0.00     | 0.00                  | 0.00     | 0.00                  | 0.30                     | 0.19   | 0.02     |
| 9,10-dihydrobenzo(a)pyrene-7(8H)-one                           | 9,10-DiHBz(a)P7on | 0.22     | 0.16                  | 0.06     | 0.00                  | 0.00     | 0.00                  | 0.23     | 0.41                  | 0.30                     | 0.83   | 0.01     |
| 7-methylbenzo(a)pyrene                                         | 7-MeBaP           | 0.05     | 0.02                  | 0.04     | 0.02                  | 0.00     | 0.00                  | 0.00     | 0.00                  | 0.00                     | 0.08   | 0.01     |
| Benzo(ghi)perylene                                             | B(ghi)Per         | 0.18     | 0.02                  | 0.06     | 0.03                  | 0.00     | 0.00                  | 0.00     | 0.00                  | 0.00                     | 0.26   | 0.01     |
| Indeno[123-cd]pyrene                                           | In[123-cd]P       | 0.10     | 0.12                  | 0.02     | 0.02                  | 0.00     | 0.00                  | 0.00     | 0.00                  | 0.19                     | 0.45   | 0.01     |
| Dibenzo(ah+ac)anthracene                                       | DB(ah+ac)A        | 0.05     | 0.02                  | 0.04     | 0.05                  | 0.00     | 0.00                  | 0.00     | 0.00                  | 0.38                     | 0.64   | 0.00     |
| Coronene                                                       | Coronene          | 0.03     | 0.01                  | 0.05     | 0.05                  | 0.00     | 0.00                  | 0.00     | 0.00                  | 0.08                     | 0.15   | 0.00     |
| <b>1-Nitropyrene (microgram/km)</b>                            | Npy               | 0.00     | 0.00                  | 0.00     | 0.00                  | 0.34     | b                     | 1.00     | 0.24                  | c                        | c      | c        |

**Notes:**

CK: crankcase emissions, TP: tailpipe emissions; B1: bus 1; B2: bus2; a: standard deviation between individual bus runs; b: only one valid measurement; c: not measured; UCM: unresolved complex mixture

Table S2. The in-cabin concentrations (in ng/m<sup>3</sup>, unless indicated otherwise) of species measured from bus 1 and bus 2 emissions

| Species                | Mnemonic      | B1C_AM <sup>a</sup><br>n=3 <sup>b</sup> |             | B1C_PM<br>n=3 |             | B1O_AM<br>n=3 |             | B1O_PM<br>n=2 |             | B2C_AM<br>n=3 |             | B2C_PM<br>n=3 |             | B2O_AM<br>n=3 |             | B2O_PM<br>n=3 |             |
|------------------------|---------------|-----------------------------------------|-------------|---------------|-------------|---------------|-------------|---------------|-------------|---------------|-------------|---------------|-------------|---------------|-------------|---------------|-------------|
|                        |               | Ave<br>rage                             | St.<br>Dev. | Ave<br>rage   | St.<br>Dev. | Ave<br>rage   | St.<br>Dev. | Ave<br>rage   | St.<br>Dev. | Ave<br>rage   | St.<br>Dev. | Ave<br>rage   | St.<br>Dev. | Ave<br>rage   | St.<br>Dev. | Ave<br>rage   | St.<br>Dev. |
| OC (ug/m3)             |               | 14.6                                    | 0.98        | 20.7          | 2.28        | 14.4          | 4.28        | 6.48          | 0.54        | 23.1          | 2.61        | 16.4          | 0.77        | 6.47          | 0.48        | 9.39          | 0.76        |
| EC (ug/m3)             |               | 2.08                                    | 0.17        | 2.74          | 0.05        | 1.62          | 0.11        | 1.30          | 0.05        | 5.20          | 0.78        | 4.29          | 0.28        | 1.76          | 0.25        | 2.68          | 0.61        |
| <b>Alkanes (ng/m3)</b> |               |                                         |             |               |             |               |             |               |             |               |             |               |             |               |             |               |             |
| Norfarnesane           | 2,6,10-C14    | 1.80                                    | 0.57        | 4.28          | 1.46        | 2.12          | 0.66        | 3.15          | 2.23        | 0.00          | 0.00        | 8.20          | 4.30        | 0.19          | 0.11        | 8.75          | 2.76        |
| Heptylcyclohexane      | C7-Cyhx       | 0.16                                    | 0.09        | 0.68          | 0.17        | 0.45          | 0.07        | 0.82          | 0.13        | 0.69          | 0.18        | 0.21          | 0.12        | 0.74          | 0.22        | 2.07          | 0.49        |
| Farnesane              | 2,6,10-C15    | 0.29                                    | 0.17        | 3.94          | 2.28        | 0.00          | 0.00        | 0.45          | 0.32        | 0.61          | 0.26        | 6.62          | 3.82        | 8.98          | 4.36        | 11.1          | 6.43        |
| Tetradecane            | nC14          | 1.20                                    | 0.63        | 0.31          | 0.18        | 0.00          | 0.00        | 1.60          | 1.13        | 0.00          | 0.00        | 6.79          | 1.96        | 0.81          | 0.46        | 0.00          | 0.00        |
| Octylcyclohexane       | C8-Cyhx       | 0.00                                    | 0.00        | 0.11          | 0.07        | 0.00          | 0.00        | 1.32          | 0.26        | 0.28          | 0.16        | 1.86          | 0.28        | 0.28          | 0.08        | 0.00          | 0.00        |
| Pentadecane            | nC15          | 1.25                                    | 0.72        | 0.62          | 0.36        | 0.00          | 0.00        | 9.52          | 2.43        | 3.42          | 1.97        | 25.3          | 5.67        | 2.23          | 0.81        | 6.03          | 3.48        |
| Nonylcyclohexane       | C9-Cyhx       | 0.86                                    | 0.32        | 0.17          | 0.10        | 0.28          | 0.16        | 0.00          | 0.00        | 1.11          | 0.41        | 3.52          | 0.16        | 2.17          | 0.85        | 0.92          | 0.53        |
| Hexadecane             | nC16          | 2.27                                    | 0.48        | 0.68          | 0.32        | 0.00          | 0.00        | 2.73          | 1.30        | 0.11          | 0.06        | 7.55          | 1.97        | 0.84          | 0.48        | 1.14          | 0.66        |
| Norpristane            | 2,6,10-C18    | 0.16                                    | 0.09        | 0.03          | 0.02        | 0.00          | 0.00        | 0.00          | 0.00        | 0.00          | 0.00        | 0.00          | 0.00        | 0.00          | 0.00        | 0.00          | 0.00        |
| Heptadecane            | nC17          | 0.00                                    | 0.00        | 3.86          | 2.23        | 0.00          | 0.00        | 9.01          | 4.59        | 0.00          | 0.00        | 28.1          | 8.36        | 3.19          | 0.94        | 27.0          | 7.81        |
| Decylcyclohexane       | C10-Cyhx      | 0.68                                    | 0.20        | 0.26          | 0.10        | 0.88          | 0.29        | 2.03          | 0.12        | 1.06          | 0.02        | 0.59          | 0.19        | 0.93          | 0.16        | 2.06          | 0.14        |
| Pristane               | 2,6,10,14-C19 | 0.73                                    | 0.38        | 19.2          | 9.93        | 21.4          | 12.1        | 2.94          | 0.81        | 79.5          | 4.61        | 47.3          | 24.9        | 1.73          | 0.50        | 41.7          | 22.6        |
| Undecylcyclohexane     | C11-Cyhx      | 0.16                                    | 0.07        | 0.34          | 0.15        | 0.96          | 0.29        | 1.37          | 0.18        | 2.61          | 0.06        | 3.27          | 0.16        | 6.01          | 3.12        | 1.03          | 0.30        |
| Octadecane             | nC18          | 0.00                                    | 0.00        | 0.00          | 0.00        | 0.00          | 0.00        | 0.00          | 0.00        | 0.00          | 0.00        | 0.00          | 0.00        | 0.00          | 0.00        | 1.58          | 0.52        |
| Phytane                | 2,6,10,14-C20 | 0.52                                    | 0.26        | 0.00          | 0.00        | 0.00          | 0.00        | 0.00          | 0.00        | 0.00          | 0.00        | 0.00          | 0.00        | 0.12          | 0.07        | 3.04          | 0.33        |
| Dodecylcyclohexane     | C12-Cyhx      | 0.05                                    | 0.03        | 0.00          | 0.00        | 0.00          | 0.00        | 0.00          | 0.00        | 0.00          | 0.00        | 0.00          | 0.00        | 0.00          | 0.00        | 0.00          | 0.00        |
| Nonadecane             | nC19          | 2.25                                    | 0.48        | 4.28          | 0.64        | 0.00          | 0.00        | 3.30          | 0.63        | 4.69          | 1.41        | 11.5          | 1.85        | 5.73          | 0.36        | 10.6          | 0.03        |

| Species               | Mnemonic     | B1C_AM <sup>a</sup><br>n=3 <sup>b</sup> |             | B1C_PM<br>n=3 |             | B1O_AM<br>n=3 |             | B1O_PM<br>n=2 |             | B2C_AM<br>n=3 |             | B2C_PM<br>n=3 |             | B2O_AM<br>n=3 |             | B2O_PM<br>n=3 |             |
|-----------------------|--------------|-----------------------------------------|-------------|---------------|-------------|---------------|-------------|---------------|-------------|---------------|-------------|---------------|-------------|---------------|-------------|---------------|-------------|
|                       |              | Ave<br>rage                             | St.<br>Dev. | Ave<br>rage   | St.<br>Dev. | Ave<br>rage   | St.<br>Dev. | Ave<br>rage   | St.<br>Dev. | Ave<br>rage   | St.<br>Dev. | Ave<br>rage   | St.<br>Dev. | Ave<br>rage   | St.<br>Dev. | Ave<br>rage   | St.<br>Dev. |
| Tridecylcyclohexane   | C13-<br>Cyhx | 2.82                                    | 0.34        | 2.27          | 0.68        | 1.69          | 0.50        | 0.29          | 0.05        | 1.69          | 0.40        | 0.69          | 0.07        | 0.87          | 0.22        | 1.09          | 0.22        |
| Eicosane              | nC20         | 4.21                                    | 0.54        | 2.32          | 1.34        | 1.86          | 0.44        | 0.80          | 0.56        | 6.05          | 0.88        | 9.55          | 1.08        | 7.22          | 0.76        | 10.1          | 1.50        |
| Tetradecylcyclohexane | C14-<br>Cyhx | 0.18                                    | 0.11        | 0.57          | 0.33        | 0.45          | 0.24        | 1.04          | 0.73        | 0.50          | 0.17        | 0.03          | 0.02        | 0.46          | 0.11        | 0.00          | 0.00        |
| Heneicosane           | nC21         | 9.41                                    | 0.92        | 21.0          | 3.84        | 23.3          | 9.08        | 14.6          | 2.95        | 19.1          | 2.00        | 29.8          | 6.03        | 21.3          | 5.48        | 10.9          | 1.00        |
| Pentadecylcyclohexane | C15-<br>Cyhx | 4.99                                    | 2.06        | 3.06          | 0.94        | 1.98          | 0.39        | 0.18          | 0.13        | 6.61          | 1.00        | 19.1          | 2.24        | 2.17          | 0.74        | 0.00          | 0.00        |
| Docosane              | nC22         | 7.61                                    | 0.51        | 9.84          | 0.46        | 6.92          | 0.69        | 5.75          | 0.13        | 16.6          | 1.16        | 17.8          | 1.05        | 11.7          | 1.44        | 8.53          | 1.53        |
| Hexadecylcyclohexane  | C16-<br>Cyhx | 0.13                                    | 0.04        | 0.54          | 0.17        | 0.31          | 0.18        | 0.34          | 0.09        | 2.25          | 0.30        | 1.17          | 0.19        | 1.30          | 0.08        | 1.41          | 0.22        |
| Tricosane             | nC23         | 20.2                                    | 0.54        | 26.9          | 3.26        | 6.72          | 0.38        | 7.43          | 1.20        | 27.4          | 2.06        | 35.1          | 2.24        | 10.2          | 1.49        | 5.54          | 1.64        |
| Heptadecylcyclohexane | C17-<br>Cyhx | 2.64                                    | 0.80        | 12.8          | 2.06        | 11.3          | 3.28        | 7.07          | 0.06        | 15.3          | 3.50        | 39.9          | 2.81        | 15.9          | 0.64        | 9.24          | 5.24        |
| Octadecylcyclohexane  | C18-<br>Cyhx | 0.60                                    | 0.17        | 1.02          | 0.43        | 0.42          | 0.24        | 0.69          | 0.00        | 6.03          | 2.04        | 3.65          | 1.43        | 0.25          | 0.07        | 0.65          | 0.25        |
| Tetracosane           | nC24         | 23.2                                    | 0.70        | 32.4          | 2.13        | 4.38          | 0.67        | 6.42          | 0.34        | 29.9          | 4.58        | 37.9          | 3.50        | 6.84          | 0.57        | 2.28          | 1.27        |
| Pentacosane           | nC25         | 32.2                                    | 2.73        | 39.5          | 5.04        | 5.39          | 0.43        | 5.01          | 0.61        | 29.5          | 5.33        | 31.6          | 0.47        | 3.84          | 1.08        | 1.90          | 1.01        |
| Nonadecylcyclohexane  | C19-<br>Cyhx | 5.33                                    | 0.41        | 7.12          | 0.84        | 0.93          | 0.29        | 1.90          | 0.25        | 9.33          | 0.78        | 10.9          | 1.28        | 2.42          | 0.27        | 3.59          | 1.04        |
| Hexacosane            | nC26         | 22.5                                    | 2.54        | 20.2          | 2.68        | 0.93          | 0.28        | 4.56          | 0.49        | 25.3          | 4.18        | 25.7          | 3.59        | 2.29          | 0.95        | 2.23          | 0.70        |
| Eicosylcyclohexane    | C20-<br>Cyhx | 0.00                                    | 0.00        | 0.34          | 0.20        | 0.00          | 0.00        | 0.77          | 0.17        | 1.47          | 0.45        | 0.31          | 0.06        | 0.37          | 0.11        | 0.11          | 0.06        |
| Heptacosane           | nC27         | 18.2                                    | 2.78        | 28.3          | 5.94        | 2.88          | 0.42        | 5.67          | 0.04        | 20.1          | 3.87        | 21.2          | 2.33        | 2.38          | 0.47        | 2.23          | 0.23        |
| Heneicosylcyclohexane | C21-<br>Cyhx | 1.62                                    | 0.27        | 0.71          | 0.28        | 0.00          | 0.00        | 1.08          | 0.28        | 2.08          | 0.51        | 0.21          | 0.12        | 0.03          | 0.02        | 0.60          | 0.19        |
| Octacosane            | nC28         | 13.8                                    | 2.74        | 13.6          | 2.28        | 3.02          | 0.29        | 0.61          | 0.02        | 13.8          | 2.79        | 14.2          | 1.70        | 0.81          | 0.13        | 1.30          | 0.43        |
| Nonacosane            | nC29         | 7.50                                    | 1.05        | 13.0          | 2.88        | 2.20          | 0.15        | 9.48          | 0.13        | 11.6          | 2.22        | 10.8          | 1.03        | 1.80          | 0.22        | 1.25          | 0.36        |
| Triacontane           | nC30         | 7.37                                    | 1.75        | 8.68          | 1.52        | 0.90          | 0.26        | 3.18          | 2.25        | 9.58          | 0.93        | 7.82          | 0.65        | 0.53          | 0.28        | 0.49          | 0.24        |
| Hentriacontane        | nC31         | 4.00                                    | 1.43        | 8.99          | 1.76        | 2.26          | 0.55        | 3.22          | 0.55        | 8.75          | 2.56        | 8.14          | 0.91        | 1.46          | 0.28        | 3.15          | 0.63        |
| Dotriacontane         | nC32         | 2.17                                    | 0.84        | 1.81          | 0.74        | 0.11          | 0.07        | 1.34          | 0.95        | 3.58          | 1.07        | 1.17          | 0.46        | 0.16          | 0.06        | 0.05          | 0.03        |
| Tritriacontane        | nC33         | 1.07                                    | 0.08        | 1.25          | 0.30        | 0.73          | 0.14        | 0.39          | 0.24        | 1.36          | 0.74        | 0.55          | 0.12        | 0.68          | 0.29        | 0.49          | 0.16        |
| Tetracontane          | nC34         | 0.68                                    | 0.22        | 0.54          | 0.11        | 0.25          | 0.12        | 0.03          | 0.02        | 0.44          | 0.19        | 0.17          | 0.07        | 0.00          | 0.00        | 0.00          | 0.00        |



| Species                                                           | Mne-<br>monic | B1C_AM <sup>a</sup> |      | B1C_PM |      | B1O_AM |      | B1O_PM |      | B2C_AM |      | B2C_PM |      | B2O_AM |      | B2O_PM |      |
|-------------------------------------------------------------------|---------------|---------------------|------|--------|------|--------|------|--------|------|--------|------|--------|------|--------|------|--------|------|
|                                                                   |               | n=3 <sup>b</sup>    |      | n=3    |      | n=3    |      | n=2    |      | n=3    |      | n=3    |      | n=3    |      | n=3    |      |
|                                                                   |               | Ave                 | St.  | Ave    | St.  | Ave    | St.  | Ave    | St.  | Ave    | St.  | Ave    | St.  | Ave    | St.  | Ave    | St.  |
| Pentatriacontane                                                  | nC35          | 1.39                | 0.43 | 0.71   | 0.04 | 0.40   | 0.12 | 0.29   | 0.20 | 0.42   | 0.15 | 0.00   | 0.00 | 0.00   | 0.00 | 0.00   | 0.00 |
| Hexatriacontane-d74                                               | C36d74        | 33.5                | 5.95 | 39.3   | 7.80 | 1.78   | 0.25 | 1.21   | 0.26 | 56.2   | 9.11 | 22.9   | 3.41 | 6.29   | 1.25 | 6.63   | 0.84 |
| Hexatriacontane                                                   | nC36          | 1.73                | 0.81 | 0.71   | 0.09 | 2.37   | 0.60 | 1.51   | 0.29 | 0.00   | 0.00 | 1.28   | 0.21 | 0.71   | 0.21 | 0.38   | 0.22 |
| Heptatriacontane                                                  | nC37          | 0.00                | 0.00 | 0.17   | 0.06 | 0.00   | 0.00 | 0.03   | 0.02 | 0.00   | 0.00 | 0.00   | 0.00 | 0.00   | 0.00 | 0.00   | 0.00 |
| Octatriacontane                                                   | nC38          | 0.13                | 0.08 | 0.23   | 0.07 | 0.00   | 0.00 | 0.00   | 0.00 | 0.00   | 0.00 | 0.00   | 0.00 | 0.00   | 0.00 | 0.00   | 0.00 |
| Nonatriacontane                                                   | nC39          | 0.13                | 0.05 | 0.06   | 0.03 | 0.03   | 0.02 | 0.00   | 0.00 | 0.00   | 0.00 | 0.10   | 0.03 | 0.00   | 0.00 | 0.00   | 0.00 |
| Tetracontane                                                      | nC40          | 0.08                | 0.03 | 0.28   | 0.08 | 0.08   | 0.03 | 0.00   | 0.00 | 0.03   | 0.02 | 0.00   | 0.00 | 0.00   | 0.00 | 0.00   | 0.00 |
| <b>Hopananes (ng/m3)</b>                                          |               |                     |      |        |      |        |      |        |      |        |      |        |      |        |      |        |      |
| 18 $\alpha$ (H)-22,29,30-<br>Trisnorneohopane                     | hop13         | 1.31                | 0.12 | 1.93   | 0.03 | 0.17   | 0.50 | 0.21   | 0.00 | 3.53   | 0.32 | 1.72   | 0.00 | 0.56   | 0.16 | 0.49   | 0.05 |
| 17 $\alpha$ (H)-22,29,30-<br>Trisnorhopane                        | hop15         | 0.50                | 0.09 | 0.71   | 0.02 | 0.03   | 0.27 | 0.05   | 0.00 | 1.72   | 0.09 | 0.90   | 0.00 | 0.22   | 0.04 | 0.22   | 0.03 |
| 17 $\alpha$ (H),21 $\beta$ (H)-29-<br>Norhopane                   | hop17         | 6.19                | 1.03 | 8.22   | 0.08 | 0.51   | 2.44 | 0.63   | 0.04 | 17.2   | 1.57 | 7.69   | 0.05 | 1.83   | 0.75 | 2.34   | 0.32 |
| 17 $\alpha$ (H),21 $\beta$ (H)-Hopane                             | hop19         | 3.92                | 0.73 | 4.74   | 0.02 | 0.28   | 1.28 | 0.34   | 0.02 | 9.30   | 0.98 | 4.65   | 0.02 | 1.02   | 0.43 | 1.41   | 0.21 |
| 17 $\beta$ (H),21 $\alpha$ (H)-hopane                             | hop20         | 0.39                | 0.09 | 0.54   | 0.00 | 0.00   | 0.20 | 0.03   | 0.02 | 1.06   | 0.12 | 0.41   | 0.02 | 0.06   | 0.07 | 0.05   | 0.03 |
| 22S-17 $\alpha$ (H),21 $\beta$ (H)-30-<br>Homohopane              | hop21         | 2.25                | 0.46 | 3.09   | 0.05 | 0.17   | 0.86 | 0.24   | 0.06 | 6.36   | 0.64 | 3.14   | 0.07 | 0.65   | 0.28 | 1.03   | 0.08 |
| 22R-17 $\alpha$ (H),21 $\beta$ (H)-30-<br>Homohopane              | hop22         | 1.73                | 0.30 | 2.52   | 0.03 | 0.17   | 0.71 | 0.18   | 0.02 | 5.14   | 0.51 | 2.31   | 0.02 | 0.43   | 0.27 | 0.81   | 0.09 |
| 17 $\beta$ (H),21 $\beta$ (H)-Hopane                              | hop23         | 0.55                | 0.09 | 0.65   | 0.03 | 0.06   | 0.18 | 0.05   | 0.00 | 1.30   | 0.13 | 0.45   | 0.00 | 0.15   | 0.14 | 0.27   | 0.03 |
| 22S-17 $\alpha$ (H),21 $\beta$ (H)-30,31-<br>Bishomohopane        | hop24         | 1.99                | 0.27 | 1.62   | 0.08 | 0.37   | 0.43 | 0.21   | 0.04 | 3.36   | 0.40 | 2.00   | 0.05 | 0.37   | 0.11 | 0.71   | 0.03 |
| 22R-17 $\alpha$ (H),21 $\beta$ (H)-30,31-<br>Bishomohopane        | hop25         | 0.73                | 0.13 | 0.99   | 0.02 | 0.03   | 0.29 | 0.05   | 0.04 | 2.25   | 0.23 | 1.10   | 0.05 | 0.12   | 0.07 | 0.38   | 0.03 |
| 22S-17 $\alpha$ (H),21 $\beta$ (H)-<br>30,31,32-Trisomohopane     | hop26         | 0.68                | 0.16 | 0.99   | 0.02 | 0.11   | 0.32 | 0.05   | 0.00 | 1.97   | 0.28 | 0.96   | 0.00 | 0.19   | 0.12 | 0.38   | 0.06 |
| 22R-17 $\alpha$ (H),21 $\beta$ (H)-<br>30,31,32-Trishomohopane    | hop27         | 0.73                | 0.08 | 0.57   | 0.04 | 0.11   | 0.18 | 0.03   | 0.02 | 1.47   | 0.14 | 0.76   | 0.02 | 0.12   | 0.17 | 0.27   | 0.06 |
| <b>Steranes (microgram/km)</b>                                    |               |                     |      |        |      |        |      |        |      |        |      |        |      |        |      |        |      |
| 20S-5 $\alpha$ (H),14 $\alpha$ (H),17 $\alpha$ (H)-<br>cholestane | ster42        | 0.08                | 0.05 | 0.26   | 0.02 | 0.03   | 0.07 | 0.18   | 0.02 | 0.31   | 0.12 | 0.28   | 0.02 | 0.06   | 0.04 | 0.11   | 0.03 |
| 20R-5 $\alpha$ (H),14 $\beta$ (H),17 $\beta$ (H)-                 | ster43        | 1.05                | 0.23 | 0.74   | 0.04 | 0.11   | 0.20 | 0.16   | 0.08 | 1.61   | 0.11 | 1.07   | 0.10 | 0.34   | 0.20 | 0.38   | 0.03 |

| Species                                                                                                                  | Mnemonic      | B1C_AM <sup>a</sup><br>n=3 <sup>b</sup> |             | B1C_PM<br>n=3 |             | B1O_AM<br>n=3 |             | B1O_PM<br>n=2 |             | B2C_AM<br>n=3 |             | B2C_PM<br>n=3 |             | B2O_AM<br>n=3 |             | B2O_PM<br>n=3 |             |
|--------------------------------------------------------------------------------------------------------------------------|---------------|-----------------------------------------|-------------|---------------|-------------|---------------|-------------|---------------|-------------|---------------|-------------|---------------|-------------|---------------|-------------|---------------|-------------|
|                                                                                                                          |               | Ave<br>rage                             | St.<br>Dev. | Ave<br>rage   | St.<br>Dev. | Ave<br>rage   | St.<br>Dev. | Ave<br>rage   | St.<br>Dev. | Ave<br>rage   | St.<br>Dev. | Ave<br>rage   | St.<br>Dev. | Ave<br>rage   | St.<br>Dev. | Ave<br>rage   | St.<br>Dev. |
| cholestane                                                                                                               |               |                                         |             |               |             |               |             |               |             |               |             |               |             |               |             |               |             |
| 20S-5 $\alpha$ (H),14 $\beta$ (H),17 $\beta$ (H)-<br>cholestane                                                          | ster44        | 1.07                                    | 0.14        | 1.22          | 0.02        | 0.14          | 0.39        | 0.18          | 0.02        | 2.42          | 0.17        | 1.28          | 0.02        | 0.37          | 0.11        | 0.38          | 0.03        |
| 20R-5 $\alpha$ (H),14 $\alpha$ (H),17 $\alpha$ (H)-<br>cholestane & 20S-13 $\beta$ (H)<br>17 $\alpha$ (H)-diastigmastane | ster45_<br>40 | 1.28                                    | 0.23        | 1.62          | 0.03        | 0.20          | 0.44        | 0.29          | 0.02        | 3.14          | 0.28        | 1.86          | 0.02        | 0.46          | 0.17        | 0.43          | 0.06        |
| 20S-5 $\alpha$ (H),14 $\alpha$ (H),17 $\alpha$ (H)-<br>ergostane                                                         | ster46        | 0.31                                    | 0.07        | 0.43          | 0.00        | 0.00          | 0.07        | 0.00          | 0.00        | 0.92          | 0.13        | 0.45          | 0.00        | 0.03          | 0.07        | 0.11          | 0.03        |
| 20R-5 $\alpha$ (H),14 $\beta$ (H),17 $\beta$ (H)-<br>ergostane                                                           | ster47        | 1.96                                    | 0.21        | 1.84          | 0.04        | 0.37          | 0.30        | 0.66          | 0.05        | 1.89          | 0.28        | 0.72          | 0.07        | 0.09          | 0.09        | 0.11          | 0.06        |
| 20S-5 $\alpha$ (H),14 $\beta$ (H),17 $\beta$ (H)-<br>ergostane & 20R-13 $\alpha$ (H),<br>17 $\beta$ (H)-diastigmastane   | ster48        | 0.92                                    | 0.31        | 0.88          | 0.02        | 0.11          | 0.11        | 0.48          | 0.00        | 2.61          | 0.26        | 1.34          | 0.00        | 0.31          | 0.24        | 0.27          | 0.06        |
| 20R-5 $\alpha$ (H),14 $\alpha$ (H),17 $\alpha$ (H)-<br>ergostane                                                         | ster49        | 0.89                                    | 0.13        | 0.91          | 0.03        | 0.08          | 0.27        | 0.26          | 0.04        | 1.72          | 0.13        | 1.00          | 0.05        | 0.19          | 0.04        | 0.22          | 0.03        |
| 20S-5 $\alpha$ (H),14 $\alpha$ (H),17 $\alpha$ (H)-<br>stigmastane                                                       | ster50        | 0.84                                    | 0.19        | 1.05          | 0.02        | 0.06          | 0.28        | 0.18          | 0.02        | 1.94          | 0.17        | 0.93          | 0.02        | 0.25          | 0.09        | 0.27          | 0.06        |
| 20R-5 $\alpha$ (H),14 $\beta$ (H),17 $\beta$ (H)-<br>stigmastane                                                         | ster51        | 1.83                                    | 0.26        | 1.67          | 0.03        | 0.17          | 0.49        | 0.21          | 0.04        | 3.47          | 0.32        | 1.72          | 0.05        | 0.43          | 0.16        | 0.60          | 0.08        |
| 20S-5 $\alpha$ (H),14 $\beta$ (H),17 $\beta$ (H)-<br>stigmastane                                                         | ster52        | 1.05                                    | 0.14        | 1.11          | 0.02        | 0.06          | 0.31        | 0.11          | 0.00        | 2.19          | 0.22        | 1.10          | 0.00        | 0.25          | 0.09        | 0.33          | 0.05        |
| 20R-5 $\alpha$ (H),14 $\alpha$ (H),17 $\alpha$ (H)-<br>stigmastane                                                       | ster53        | 0.71                                    | 0.18        | 0.88          | 0.00        | 0.00          | 0.26        | 0.05          | 0.04        | 1.78          | 0.19        | 0.93          | 0.05        | 0.19          | 0.07        | 0.22          | 0.03        |
| <b>PAH (ng/m3)</b>                                                                                                       |               |                                         |             |               |             |               |             |               |             |               |             |               |             |               |             |               |             |
| Retene                                                                                                                   | Retene        | 0.00                                    | 0.00        | 0.00          | 0.00        | 0.00          | 0.00        | 0.00          | 0.00        | 0.00          | 0.00        | 0.00          | 0.00        | 0.00          | 0.00        | 0.00          | 0.00        |
| Benzonaphthothiophene                                                                                                    | BNapT         | 0.00                                    | 0.00        | 0.03          | 0.02        | 0.00          | 0.00        | 0.00          | 0.00        | 0.17          | 0.00        | 0.17          | 0.02        | 0.03          | 0.02        | 0.05          | 0.03        |
| Benzo(c)phenanthrene                                                                                                     | BcPh          | 0.00                                    | 0.00        | 0.00          | 0.00        | 0.00          | 0.00        | 0.00          | 0.00        | 0.06          | 0.03        | 0.00          | 0.00        | 0.00          | 0.00        | 0.00          | 0.00        |
| Benz(a)anthracene                                                                                                        | BaA           | 0.00                                    | 0.00        | 0.03          | 0.02        | 0.03          | 0.02        | 0.00          | 0.00        | 0.14          | 0.02        | 0.14          | 0.05        | 0.03          | 0.02        | 0.11          | 0.03        |
| Chrysene-Triphenylene                                                                                                    | Chr/Tp        | 0.03                                    | 0.02        | 0.06          | 0.02        | 0.00          | 0.00        | 0.08          | 0.06        | 0.72          | 0.11        | 0.45          | 0.05        | 0.03          | 0.02        | 0.16          | 0.09        |
| Benzanthrone                                                                                                             | Bzanthr       | 0.03                                    | 0.02        | 0.03          | 0.02        | 0.00          | 0.00        | 0.03          | 0.02        | 0.08          | 0.00        | 0.14          | 0.02        | 0.03          | 0.02        | 0.00          | 0.00        |
| 7-methylbenz(a)anthracene                                                                                                | 7-<br>MeBaA   | 0.00                                    | 0.00        | 0.03          | 0.02        | 0.00          | 0.00        | 0.00          | 0.00        | 0.03          | 0.02        | 0.03          | 0.02        | 0.00          | 0.00        | 0.00          | 0.00        |
| Benz(a)anthracene-7,12-                                                                                                  | BaA-          | 0.13                                    | 0.02        | 0.34          | 0.12        | 0.00          | 0.00        | 0.07          | 0.00        | 0.14          | 0.03        | 0.21          | 0.06        | 0.00          | 0.00        | 0.00          | 0.00        |

| Species                              | Mnemonic            | B1C_AM <sup>a</sup><br>n=3 <sup>b</sup> |             | B1C_PM<br>n=3 |             | B1O_AM<br>n=3 |             | B1O_PM<br>n=2 |             | B2C_AM<br>n=3 |             | B2C_PM<br>n=3 |             | B2O_AM<br>n=3 |             | B2O_PM<br>n=3 |             |
|--------------------------------------|---------------------|-----------------------------------------|-------------|---------------|-------------|---------------|-------------|---------------|-------------|---------------|-------------|---------------|-------------|---------------|-------------|---------------|-------------|
|                                      |                     | Ave<br>rage                             | St.<br>Dev. | Ave<br>rage   | St.<br>Dev. | Ave<br>rage   | St.<br>Dev. | Ave<br>rage   | St.<br>Dev. | Ave<br>rage   | St.<br>Dev. | Ave<br>rage   | St.<br>Dev. | Ave<br>rage   | St.<br>Dev. | Ave<br>rage   | St.<br>Dev. |
| dione                                | 7,12-dione          |                                         |             |               |             |               |             |               |             |               |             |               |             |               |             |               |             |
| 5+6-methylchrysene                   | 5,6-MeChr           | 0.00                                    | 0.00        | 0.00          | 0.00        | 0.00          | 0.00        | 0.00          | 0.00        | 0.06          | 0.02        | 0.03          | 0.02        | 0.00          | 0.00        | 0.00          | 0.00        |
| Benzo(b+j+k)fluoranthene             | B(b+j+k)F           | 0.39                                    | 0.03        | 0.48          | 0.09        | 0.23          | 0.02        | 0.21          | 0.04        | 0.81          | 0.11        | 0.66          | 0.07        | 0.40          | 0.07        | 0.38          | 0.08        |
| BeP                                  | BeP                 | 0.10                                    | 0.03        | 0.14          | 0.02        | 0.11          | 0.02        | 0.11          | 0.00        | 0.28          | 0.04        | 0.28          | 0.04        | 0.12          | 0.04        | 0.11          | 0.03        |
| BaP                                  | BaP                 | 0.05                                    | 0.02        | 0.00          | 0.00        | 0.03          | 0.02        | 0.05          | 0.00        | 0.08          | 0.03        | 0.10          | 0.03        | 0.03          | 0.02        | 0.11          | 0.06        |
| Perylene                             | Per                 | 0.10                                    | 0.03        | 0.00          | 0.00        | 0.00          | 0.00        | 0.00          | 0.00        | 0.08          | 0.05        | 0.03          | 0.02        | 0.00          | 0.00        | 0.00          | 0.00        |
| 9,10-dihydrobenzo(a)pyrene-7(8H)-one | 9,10-DiHBz(a)P-7-on | 0.16                                    | 0.05        | 0.00          | 0.00        | 0.03          | 0.02        | 0.00          | 0.00        | 0.06          | 0.02        | 0.24          | 0.02        | 0.00          | 0.00        | 0.05          | 0.03        |
| 7-methylbenzo(a)pyrene               | 7-MeBaP             | 0.03                                    | 0.02        | 0.03          | 0.02        | 0.00          | 0.00        | 0.00          | 0.00        | 0.06          | 0.02        | 0.07          | 0.02        | 0.00          | 0.00        | 0.00          | 0.00        |
| Benzo(ghi)perylene                   | B(ghi)P             | 0.10                                    | 0.02        | 0.14          | 0.04        | 0.11          | 0.02        | 0.11          | 0.00        | 0.33          | 0.05        | 0.07          | 0.02        | 0.25          | 0.05        | 0.27          | 0.11        |
| Indeno[123-cd]pyrene                 | In[123-cd]P         | 0.00                                    | 0.00        | 0.08          | 0.05        | 0.03          | 0.02        | 0.03          | 0.02        | 0.14          | 0.04        | 0.21          | 0.06        | 0.03          | 0.02        | 0.00          | 0.00        |
| Dibenzo(ah+ac)anthracene             | DB(ah+ac)A          | 0.00                                    | 0.00        | 0.00          | 0.00        | 0.00          | 0.00        | 0.03          | 0.02        | 0.06          | 0.02        | 0.03          | 0.02        | 0.03          | 0.02        | 0.00          | 0.00        |
| Coronene                             | Corone              | 0.00                                    | 0.00        | 0.03          | 0.02        | 0.00          | 0.00        | 0.00          | 0.00        | 0.03          | 0.02        | 0.03          | 0.02        | 0.00          | 0.00        | 0.05          | 0.03        |
| <b>1-Nitropyrene (ng/m3)</b>         | Npy                 | 0.000                                   | 0.000       | 0.000         | 0.002       | 0.002         | 0.001       | 0.000         | 0.001       | 0.000         | 0.002       | 0.002         | 0.001       | 0.000         | 0.001       | 0.000         | 0.000       |

**Notes:** a: B1: bus 1; B2: bus2; C: window closed; O: window open; AM: morning sampling; PM: afternoon sampling; b: n=number of bus runs  
c: the average is weighted according to sampling volumes of each run

Table S3. Ambient concentrations of the bus emissions species, as measured by the lead vehicle

| Species                | Mnemonic      | LVB1C_ AM | LVB1C_ PM | LVB1O_ AM | LVB1O_ PM | LVB2C_ AM | LVB2C_ PM | LVB2O_ AM | LVB2O_ PM |  |
|------------------------|---------------|-----------|-----------|-----------|-----------|-----------|-----------|-----------|-----------|--|
| OC (ug/m3)             |               | 6.25      | 10.27     | 8.02      | 7.89      | 5.03      | 5.74      | 4.84      | 6.39      |  |
| EC (ug/m3)             |               | 1.03      | 1.40      | 1.11      | 0.69      | 0.85      | 1.04      | 1.08      | 1.26      |  |
| <b>Alkanes (ng/m3)</b> |               |           |           |           |           |           |           |           |           |  |
| Norfarnesane           | 2,6,10-C14    | 0.00      | 9.90      | 1.52      | 0.00      | 3.54      | 0.00      | 23.58     | 0.54      |  |
| Heptylcyclohexane      | C7-Cyhx       | 0.00      | 1.16      | 0.17      | 0.68      | 0.11      | 0.72      | 23.01     | 0.22      |  |
| Farnesane              | 2,6,10-C15    | 0.00      | 0.13      | 0.06      | 6.75      | 0.70      | 21.53     | 0.21      | 2.48      |  |
| Tetradecane            | nC14          | 0.31      | 0.00      | 0.00      | 1.59      | 0.00      | 0.00      | 0.00      | 0.00      |  |
| Octylcyclohexane       | C8-Cyhx       | 0.00      | 0.00      | 0.28      | 3.80      | 0.00      | 0.00      | 1.06      | 0.00      |  |
| Pentadecane            | nC15          | 0.36      | 0.00      | 1.30      | 31.31     | 0.00      | 0.00      | 10.56     | 0.00      |  |
| Nonylcyclohexane       | C9-Cyhx       | 0.00      | 0.00      | 0.00      | 0.00      | 0.21      | 1.01      | 0.21      | 0.00      |  |
| Hexadecane             | nC16          | 0.00      | 0.00      | 0.00      | 8.23      | 0.00      | 0.00      | 4.22      | 0.00      |  |
| Norpristane            | 2,6,10-C18    | 0.00      | 0.00      | 0.00      | 0.00      | 0.00      | 0.00      | 0.00      | 0.00      |  |
| Heptadecane            | nC17          | 0.00      | 0.00      | 0.00      | 43.79     | 0.00      | 0.00      | 4.79      | 10.88     |  |
| Decylcyclohexane       | C10-Cyhx      | 0.31      | 0.00      | 1.18      | 1.93      | 0.32      | 0.00      | 0.21      | 0.00      |  |
| Pristane               | 2,6,10,14-C19 | 0.00      | 2.44      | 1.69      | 6.86      | 0.00      | 0.00      | 3.66      | 0.00      |  |
| Undecylcyclohexane     | C11-Cyhx      | 0.83      | 0.13      | 0.00      | 1.70      | 1.13      | 1.08      | 2.75      | 1.83      |  |
| Octadecane             | nC18          | 0.00      | 0.00      | 0.00      | 0.00      | 0.00      | 0.00      | 0.63      | 0.00      |  |
| Phytane                | 2,6,10,14-C20 | 0.00      | 0.00      | 0.00      | 0.00      | 0.00      | 0.00      | 0.00      | 0.00      |  |
| Dodecylcyclohexane     | C12-Cyhx      | 1.29      | 0.00      | 0.00      | 0.34      | 0.00      | 0.00      | 0.00      | 0.00      |  |
| Nonadecane             | nC19          | 0.88      | 0.00      | 0.56      | 9.36      | 0.00      | 1.87      | 14.00     | 1.40      |  |
| Tridecylcyclohexane    | C13-Cyhx      | 1.45      | 0.00      | 2.03      | 1.36      | 0.75      | 1.87      | 1.55      | 1.72      |  |
| Eicosane               | nC20          | 2.22      | 1.93      | 0.45      | 2.16      | 0.00      | 2.09      | 5.56      | 4.31      |  |
| Tetradecylcyclohexane  | C14-Cyhx      | 0.00      | 0.13      | 0.00      | 0.40      | 0.21      | 0.58      | 0.42      | 0.00      |  |
| Heneicosane            | nC21          | 5.11      | 8.61      | 4.06      | 43.28     | 25.28     | 38.23     | 14.78     | 3.23      |  |
| Pentadecylcyclohexane  | C15-Cyhx      | 0.05      | 4.76      | 2.42      | 0.68      | 0.48      | 0.86      | 0.77      | 0.00      |  |
| Docosane               | nC22          | 3.20      | 9.00      | 7.32      | 12.59     | 4.29      | 8.35      | 8.30      | 5.50      |  |
| Hexadecylcyclohexane   | C16-Cyhx      | 0.00      | 0.64      | 0.45      | 0.34      | 1.02      | 0.00      | 0.70      | 0.32      |  |
| Tricosane              | nC23          | 8.21      | 12.08     | 14.87     | 27.79     | 6.70      | 12.96     | 11.26     | 6.79      |  |
| Heptadecylcyclohexane  | C17-Cyhx      | 8.11      | 2.31      | 0.23      | 18.95     | 9.70      | 16.13     | 9.22      | 0.00      |  |
| Octadecylcyclohexane   | C18-Cyhx      | 0.00      | 0.64      | 0.51      | 0.96      | 0.00      | 2.66      | 0.00      | 0.00      |  |

| Species                                                | Mnemonic | LVB1C_<br>AM | LVB1C<br>_PM | LVB1O<br>_AM | LVB1O<br>_PM | LVB2C<br>_AM | LVB2C_<br>PM | LVB2O<br>_AM | LVB2O<br>_PM |
|--------------------------------------------------------|----------|--------------|--------------|--------------|--------------|--------------|--------------|--------------|--------------|
| Tetracosane                                            | nC24     | 7.39         | 9.13         | 10.03        | 18.32        | 5.52         | 7.99         | 9.08         | 1.40         |
| Pentacosane                                            | nC25     | 8.83         | 11.18        | 10.20        | 11.63        | 4.77         | 5.11         | 6.69         | 1.62         |
| Nonadecylcyclohexane                                   | C19-Cyhx | 1.45         | 2.96         | 1.75         | 6.07         | 1.29         | 4.82         | 0.99         | 1.83         |
| Hexacosane                                             | nC26     | 3.87         | 3.86         | 3.32         | 12.71        | 1.98         | 7.63         | 2.53         | 0.32         |
| Eicosylcyclohexane                                     | C20-Cyhx | 0.00         | 0.51         | 0.00         | 1.76         | 0.00         | 1.15         | 0.77         | 0.00         |
| Heptacosane                                            | nC27     | 5.94         | 5.27         | 4.68         | 7.83         | 2.09         | 3.46         | 2.53         | 0.65         |
| Heneicosylcyclohexane                                  | C21-Cyhx | 0.00         | 0.26         | 0.00         | 1.36         | 0.00         | 0.14         | 0.00         | 0.00         |
| Octacosane                                             | nC28     | 4.60         | 7.20         | 6.59         | 6.47         | 4.93         | 5.40         | 2.25         | 3.77         |
| Nonacosane                                             | nC29     | 2.22         | 1.03         | 1.75         | 1.59         | 1.82         | 0.22         | 0.14         | 3.02         |
| Triacontane                                            | nC30     | 1.91         | 0.00         | 0.39         | 1.65         | 0.00         | 0.43         | 0.00         | 1.94         |
| Hentriacontane                                         | nC31     | 4.44         | 1.03         | 1.69         | 3.01         | 0.54         | 1.22         | 0.70         | 3.66         |
| Dotriacontane                                          | nC32     | 2.69         | 0.00         | 0.96         | 1.36         | 0.00         | 0.00         | 0.00         | 1.51         |
| Tritriacontane                                         | nC33     | 2.89         | 1.67         | 0.06         | 0.00         | 0.27         | 0.72         | 0.00         | 3.77         |
| Tetatriacontane                                        | nC34     | 1.19         | 0.26         | 0.00         | 0.00         | 0.00         | 0.00         | 0.00         | 0.00         |
| Pentatriacontane                                       | nC35     | 1.50         | 0.64         | 0.39         | 0.00         | 0.00         | 0.00         | 0.00         | 0.00         |
| Hexatriacontane-d74                                    | nC36d74  | 0.00         | 0.00         | 0.00         | 0.00         | 0.05         | 0.00         | 0.00         | 0.00         |
| Hexatriacontane                                        | nC36     | 2.63         | 0.64         | 0.45         | 5.45         | 0.54         | 0.00         | 0.92         | 0.32         |
| Heptatriacontane                                       | nC37     | 0.05         | 0.00         | 0.00         | 0.00         | 0.00         | 0.00         | 0.00         | 0.00         |
| Octatriacontane                                        | nC38     | 0.00         | 0.00         | 0.00         | 0.00         | 0.00         | 0.00         | 0.00         | 0.00         |
| Nonatriacontane                                        | nC39     | 0.00         | 0.13         | 0.06         | 0.45         | 0.00         | 0.00         | 0.00         | 0.00         |
| Tetracontane                                           | nC40     | 0.16         | 0.00         | 0.00         | 0.00         | 0.00         | 0.00         | 0.00         | 0.00         |
| <b>Hopanes (ng/m3)</b>                                 |          |              |              |              |              |              |              |              |              |
| 18 $\alpha$ (H)-22,29,30-Trisnorhopane                 | hop13    | 0.16         | 0.00         | 0.11         | 0.17         | 0.05         | 0.14         | 0.00         | 0.00         |
| 17 $\alpha$ (H)-22,29,30-Trisnorhopane                 | hop15    | 0.00         | 0.00         | 0.06         | 0.06         | 0.00         | 0.07         | 0.00         | 0.00         |
| 17 $\alpha$ (H),21 $\beta$ (H)-29-Norhopane            | hop17    | 0.31         | 0.00         | 0.17         | 0.28         | 0.43         | 0.07         | 0.00         | 0.32         |
| 17 $\alpha$ (H),21 $\beta$ (H)-Hopane                  | hop19    | 0.16         | 0.00         | 0.00         | 0.17         | 0.32         | 0.07         | 0.00         | 0.11         |
| 17 $\beta$ (H),21 $\alpha$ (H)-hopane                  | hop20    | 0.00         | 0.00         | 0.00         | 0.06         | 0.00         | 0.00         | 0.00         | 0.00         |
| 22S-17 $\alpha$ (H),21 $\beta$ (H)-30-Homohopane       | hop21    | 0.10         | 0.00         | 0.00         | 0.06         | 0.05         | 0.00         | 0.00         | 0.22         |
| 22R-17 $\alpha$ (H),21 $\beta$ (H)-30-Homohopane       | hop22    | 0.00         | 0.00         | 0.00         | 0.11         | 0.00         | 0.07         | 0.00         | 0.22         |
| 17 $\beta$ (H),21 $\beta$ (H)-Hopane                   | hop23    | 0.00         | 0.00         | 0.00         | 0.06         | 0.05         | 0.07         | 0.00         | 0.11         |
| 22S-17 $\alpha$ (H),21 $\beta$ (H)-30,31-Bishomohopane | hop24    | 0.10         | 0.00         | 0.06         | 0.23         | 0.11         | 0.07         | 0.00         | 0.54         |
| 22R-17 $\alpha$ (H),21 $\beta$ (H)-30,31-              | hop25    | 0.00         | 0.00         | 0.00         | 0.00         | 0.05         | 0.00         | 0.00         | 0.11         |

| Species                                                                                                              | Mnemonic       | LVB1C_ AM | LVB1C _PM | LVB1O _AM | LVB1O _PM | LVB2C _AM | LVB2C PM | LVB2O _AM | LVB2O _PM |
|----------------------------------------------------------------------------------------------------------------------|----------------|-----------|-----------|-----------|-----------|-----------|----------|-----------|-----------|
| <b>Bishomohopane</b>                                                                                                 |                |           |           |           |           |           |          |           |           |
| 22S-17 $\alpha$ (H),21 $\beta$ (H)-30,31,32-<br>Trisomohopane                                                        | hop26          | 0.05      | 0.13      | 0.00      | 0.06      | 0.05      | 0.00     | 0.00      | 0.11      |
| 22R-17 $\alpha$ (H),21 $\beta$ (H)-30,31,32-<br>Trishomohopane                                                       | hop27          | 0.00      | 0.13      | 0.06      | 0.06      | 0.05      | 0.00     | 0.00      | 0.11      |
| <b>Steranes (microgram/km)</b>                                                                                       |                |           |           |           |           |           |          |           |           |
| 20S-5 $\alpha$ (H),14 $\alpha$ (H),17 $\alpha$ (H)-cholestane                                                        | ster42         | 0.05      | 0.00      | 0.06      | 0.45      | 0.05      | 0.14     | 0.07      | 0.00      |
| 20R-5 $\alpha$ (H),14 $\beta$ (H),17 $\beta$ (H)-cholestane                                                          | ster43         | 0.16      | 0.00      | 0.06      | 0.45      | 0.11      | 0.07     | 0.07      | 0.00      |
| 20S-5 $\alpha$ (H),14 $\beta$ (H),17 $\beta$ (H)-cholestane                                                          | ster44         | 0.00      | 0.00      | 0.06      | 0.11      | 0.11      | 0.14     | 0.07      | 0.00      |
| 20R-5 $\alpha$ (H),14 $\alpha$ (H),17 $\alpha$ (H)-cholestane<br>& 20S-13 $\beta$ (H),17 $\alpha$ (H)-diastigmastane | ster45_40      | 0.16      | 0.13      | 0.11      | 0.34      | 0.16      | 0.14     | 0.07      | 0.11      |
| 20S-5 $\alpha$ (H),14 $\alpha$ (H),17 $\alpha$ (H)-ergostane                                                         | ster46         | 0.05      | 0.00      | 0.00      | 0.06      | 0.00      | 0.00     | 0.00      | 0.00      |
| 20R-5 $\alpha$ (H),14 $\beta$ (H),17 $\beta$ (H)-ergostane                                                           | ster47         | 0.57      | 0.13      | 0.34      | 0.51      | 0.16      | 0.07     | 0.00      | 0.22      |
| 20S-5 $\alpha$ (H),14 $\beta$ (H),17 $\beta$ (H)-ergostane &<br>20R-13 $\alpha$ (H),17 $\beta$ (H)-diastigmastane    | ster48         | 0.00      | 0.00      | 0.00      | 0.06      | 0.00      | 0.00     | 0.00      | 0.00      |
| 20R-5 $\alpha$ (H),14 $\alpha$ (H),17 $\alpha$ (H)-ergostane                                                         | ster49         | 0.05      | 0.13      | 0.06      | 0.11      | 0.05      | 0.00     | 0.00      | 0.00      |
| 20S-5 $\alpha$ (H),14 $\alpha$ (H),17 $\alpha$ (H)-stigmastane                                                       | ster50         | 0.05      | 0.13      | 0.00      | 0.17      | 0.05      | 0.07     | 0.00      | 0.00      |
| 20R-5 $\alpha$ (H),14 $\beta$ (H),17 $\beta$ (H)-stigmastane                                                         | ster51         | 0.10      | 0.13      | 0.11      | 0.11      | 0.16      | 0.07     | 0.07      | 0.11      |
| 20S-5 $\alpha$ (H),14 $\beta$ (H),17 $\beta$ (H)-stigmastane                                                         | ster52         | 0.05      | 0.00      | 0.00      | 0.00      | 0.05      | 0.00     | 0.00      | 0.00      |
| 20R-5 $\alpha$ (H),14 $\alpha$ (H),17 $\alpha$ (H)-stigmastane                                                       | ster53         | 0.00      | 0.00      | 0.00      | 0.06      | 0.00      | 0.00     | 0.00      | 0.00      |
| <b>PAH (ng/m3)</b>                                                                                                   |                |           |           |           |           |           |          |           |           |
| Retene                                                                                                               | Retene         | 0.00      | 0.00      | 0.00      | 0.00      | 0.00      | 0.00     | 0.00      | 0.00      |
| Benzonaphthothiophene                                                                                                | BNapTph        | 0.00      | 0.00      | 0.00      | 0.00      | 0.05      | 0.00     | 0.00      | 0.00      |
| Benzo(c)phenanthrene                                                                                                 | BcPh           | 0.00      | 0.00      | 0.00      | 0.00      | 0.00      | 0.00     | 0.00      | 0.00      |
| Benz(a)anthracene                                                                                                    | BaA            | 0.00      | 0.00      | 0.00      | 0.06      | 0.00      | 0.14     | 0.00      | 0.00      |
| Chrysene-Triphenylene                                                                                                | Chr/Tphe       | 0.00      | 0.00      | 0.00      | 0.00      | 0.05      | 0.07     | 0.00      | 0.11      |
| Benzanthrone                                                                                                         | Bzanthrone     | 0.00      | 0.00      | 0.00      | 0.00      | 0.05      | 0.07     | 0.00      | 0.00      |
| 7-methylbenz(a)anthracene                                                                                            | 7-MeBaA        | 0.00      | 0.00      | 0.00      | 0.00      | 0.00      | 0.00     | 0.00      | 0.00      |
| Benzo(a)anthracene-7,12-dione                                                                                        | BaA-7,12-dione | 0.00      | 0.00      | 0.06      | 0.00      | 0.00      | 0.00     | 0.00      | 0.00      |
| 5+6-methylchrysene                                                                                                   | 5,6-MeChr      | 0.00      | 0.00      | 0.00      | 0.00      | 0.00      | 0.00     | 0.00      | 0.00      |
| Benzo(b+j+k)fluoranthene                                                                                             | B(b+j+k)F      | 0.21      | 0.39      | 0.28      | 0.40      | 0.27      | 0.50     | 0.21      | 0.22      |
| BeP                                                                                                                  | BeP            | 0.10      | 0.13      | 0.11      | 0.11      | 0.05      | 0.22     | 0.07      | 0.00      |
| BaP                                                                                                                  | BaP            | 0.05      | 0.13      | 0.06      | 0.06      | 0.05      | 0.00     | 0.00      | 0.00      |

| <b>Species</b>                       | <b>Mnemonic</b>          | LVB1C_<br>AM | LVB1C<br>_PM | LVB1O<br>_AM | LVB1O<br>_PM | LVB2C<br>_AM | LVB2C_<br>PM | LVB2O<br>_AM | LVB2O<br>_PM |
|--------------------------------------|--------------------------|--------------|--------------|--------------|--------------|--------------|--------------|--------------|--------------|
| Perylene                             | Per                      | 0.00         | 0.00         | 0.00         | 0.00         | 0.00         | 0.00         | 0.00         | 0.00         |
| 9,10-dihydrobenzo(a)pyrene-7(8H)-one | 9,10-DiHBz(a)P-<br>7-one | 0.00         | 0.00         | 0.00         | 0.00         | 0.05         | 0.00         | 0.00         | 0.22         |
| 7-methylbenzo(a)pyrene               | 7-MeBaP                  | 0.00         | 0.00         | 0.00         | 0.00         | 0.00         | 0.00         | 0.00         | 0.00         |
| Benzo(ghi)perylene                   | B(ghi)Per                | 0.10         | 0.64         | 0.06         | 0.11         | 0.11         | 0.14         | 0.21         | 0.22         |
| Indeno[123-cd]pyrene                 | In[123-cd]P              | 0.00         | 0.00         | 0.06         | 0.06         | 0.21         | 0.07         | 0.00         | 0.00         |
| Dibenzo(ah+ac)anthracene             | DB(ah+ac)A               | 0.00         | 0.00         | 0.00         | 0.00         | 0.00         | 0.00         | 0.00         | 0.00         |
| Coronene                             | Coronene                 | 0.00         | 0.00         | 0.00         | 0.06         | 0.05         | 0.07         | 0.00         | 0.00         |
| <b>1-Nitropyrene (ng/m3)</b>         | Npy                      | 0.01         | 0.00         | 0.00         | 0.00         | 0.01         | 0.01         | 0.00         | 0.01         |

**Notes:** a: LV: lead vehicle; B1: bus 1; B2: bus2; C: window closed; O: window open; AM: morning sampling; PM: afternoon sampling

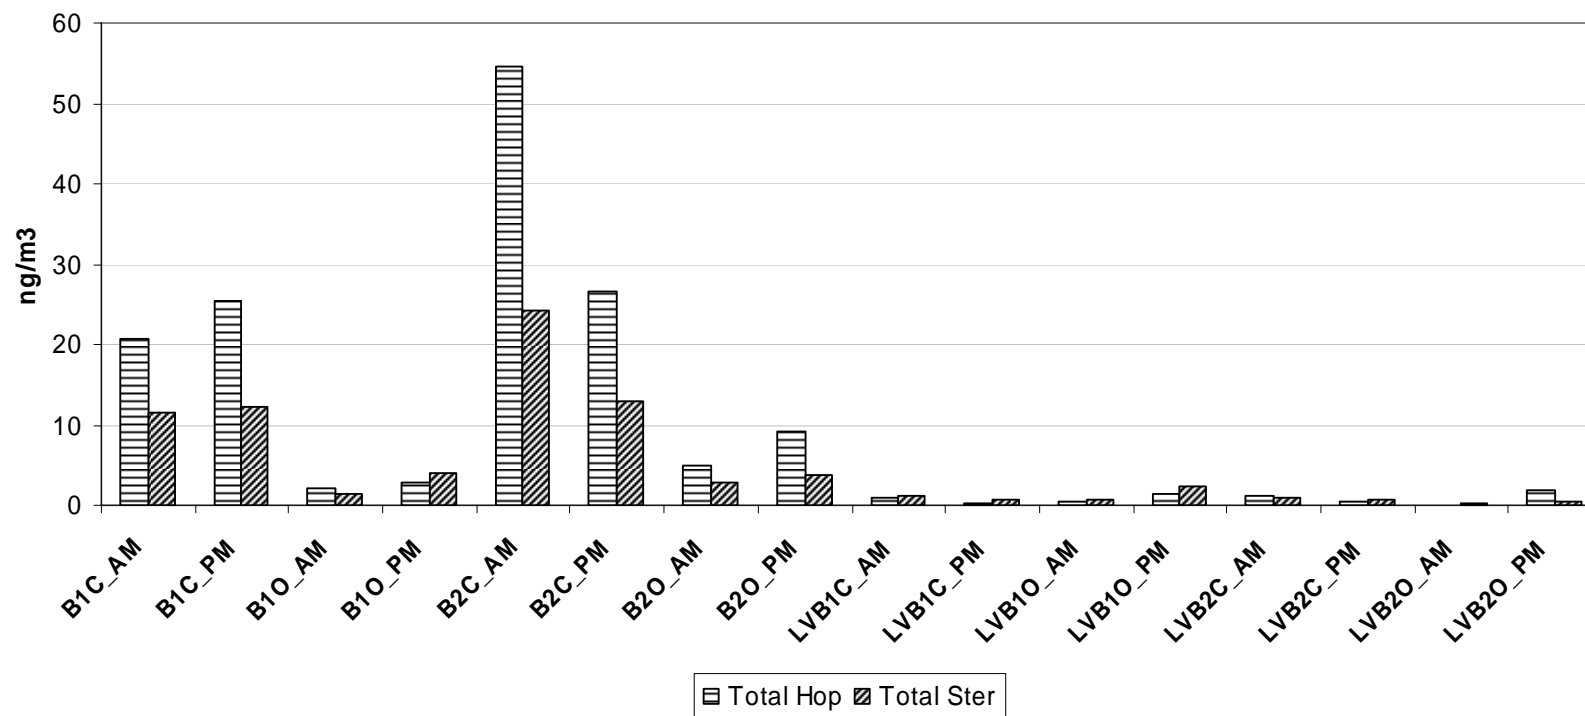

Figure S1. Concentrations of hopanes and steranes in bus cabins and in ambient air as measured by the lead vehicle. B1: bus 1; B2: bus 2; C: window closed; O: window open; AM: morning sample; PM: afternoon sample; LV: lead vehicle



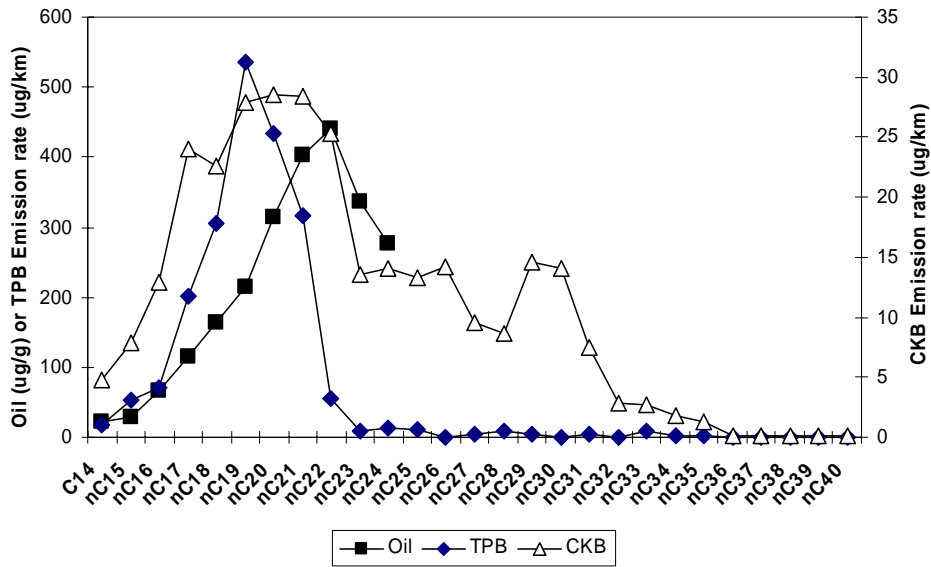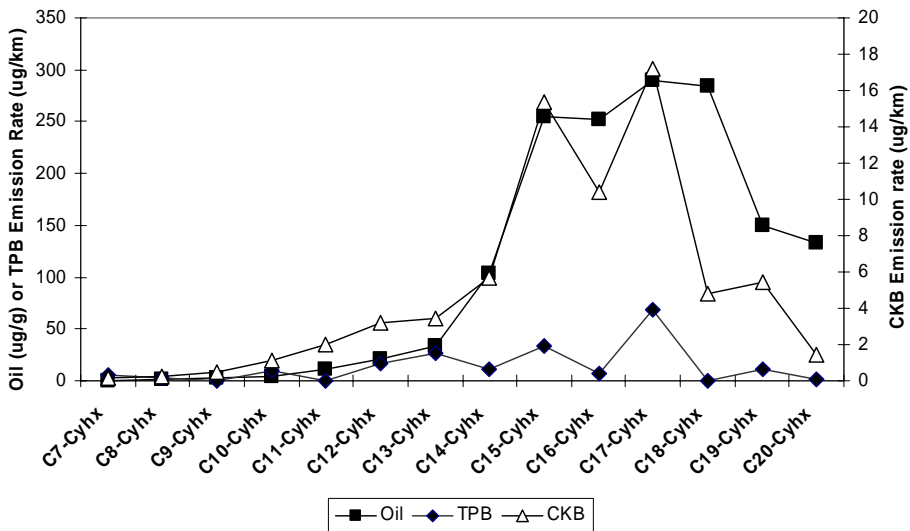

Figure S2. Comparison of n-alkanes (upper panel) and n-alkylcyclohexanes (lower panel) in average crankcase (CKB) and tailpipe (TPB) emissions profiles from both school buses with lube oil (Oil) composition

**References:**

1. Weaver C.S. and Petty L.E. Reproducibility and accuracy of on-board emissions measurements using the RAVEM system. *SAE International*, **2004**, SAE Paper No.2004-01-0965
